# Supplementary material for: Controllable one-pot synthesis of FeSe2nanooctahedra embedded microtubes by a sacrificial self-template method
Source: Royal Society of Chemistry journal article supplement (doi:10.1039/c6nj03180c), 2016-11-29
Supplement: c6nj03180c1.pdf [file c6nj03180c1.pdf]

Electronic Supplementary Material (ESI) for New Journal of Chemistry.

This journal is © The Royal Society of Chemistry and Centre National de la Recherche Scientifique 2016

Electronic Supplementary Information (ESI) for

**Controllable One-pot Synthesis of FeSe<sub>2</sub> Nanooctahedra Embedded Microtubes by  
Sacrificial Self-Template Method**

Sheng Yang,<sup>‡</sup> Wenbin You,<sup>‡</sup> Yuanzhe Song, Shijun Yang\* and Renchao Che\*

Laboratory of Advanced Materials, Fudan University, Shanghai 200438, P.R.China.

\*Corresponding author. Prof. Renchao Che E-mail: [rcche@fudan.edu.cn](mailto:rcche@fudan.edu.cn). Prof. Shijun

Yang E-mail: [ysj197018@163.com](mailto:ysj197018@163.com)

This file contains:

**S1: The possible chemical equation**

**S2: Detailed explanation about morphology evolution of the FeSe<sub>2</sub>**

**S3: Detailed discussion about formation of FeSe<sub>2</sub> microtubes**

**Table S1**

**Fig. S1-3.**

### **S1: The possible chemical equation**

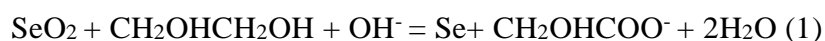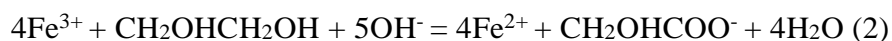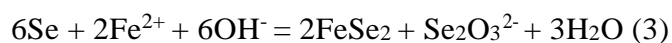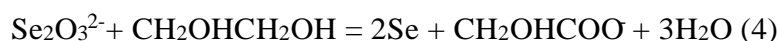

Comprehensive consideration of all the results and reference, the formation of SeO<sub>2</sub> microtubes and nanosheets may possibly conduct according to pervious chemical equations. For existence of reaction (4), the Se is residual unavoidably.

### **S2: Detailed explanation about morphology evolution of the FeSe<sub>2</sub>**

Here, we proposed a "dual-template" mechanism to explain the morphology evolution process of the FeSe<sub>2</sub>. In the early stages of the reaction, SeO<sub>2</sub> was reduced into Se particle with assistance of ethylene glycol (EG). Gradually, these nuclei became crystal seeds through crystallization. Meanwhile, EG was attached to the active surface of particles. Polyvinylpyrrolidone (PVP) was prone to cover the surface of particle, moulding the shape of particles into rod and making crystallization along a specific orientation. Absence of PVP or break of the PVP chain takes responsible for the formation of the final nanooctahedra FeSe<sub>2</sub> alloy. The EG reduced the Fe<sup>3+</sup> into Fe<sup>2+</sup> at the same time, which then reacted with Se with the assistance of EG and sodium hydroxide (NaOH). The NaOH absorbed H<sup>+</sup> ions to make water alkaline and ensure the normal conduction of reduction reaction. The reaction rate along the [001] direction (c axis) was much faster than that at the normal plane due to the "restriction protection" of PVP on specific crystal facets. Therefore, the primary Se nuclei grew

up to a one-dimensional rod-like structure and finally evolve into nanooctahedras FeSe<sub>2</sub> embedded microtube via Ostwald ripening.

### **S3: Detailed discussion about formation of FeSe<sub>2</sub> microtubes**

From the S1 we can know that EG is the reduction, so the production will remain as Se if the EG is deficient and can't transform into FeSe<sub>2</sub> (Fig. S1a-b). However, the final tube structure will collapse (Fig. S1c-d) if EG usage go overboard, which is similar to the situations of reaction for a long period of time (Fig. 1c) and replacement Fe<sup>3+</sup> with Fe<sup>2+</sup> (Fig. S2g-h). The main reason is that remnant Se is media for FeSe<sub>2</sub> embedded in it. In addition, the NaOH is an additive to adjust the pH value which is important to keep the further reaction of FeSe<sub>2</sub> formation going. An alkaline environment may protect the product of Se and FeSe<sub>2</sub> from being destroyed by acid at the same time. The absence of NaOH will cause reaction (2-4) unable to continue and none FeSe<sub>2</sub> can be obtained. However, if the dosage of NaOH is excess, the morphologies of mid Se rods and final FeSe<sub>2</sub> tubes can't be promised (Fig. S2c-d), too. For the reason that the OH<sup>-</sup> can turn Fe<sup>3+</sup> into Fe(OH)<sub>3</sub>, the reduction of Fe<sup>3+</sup> and formation of FeSe<sub>2</sub> will becomes more difficultly. The final phase of product will transform into Fe<sub>2</sub>O<sub>3</sub> (Fig. S3). Besides, if the reaction temperature is not high enough, the reaction equation may not conduct successfully and the FeSe<sub>2</sub> microtubes can't form, too (Fig. S2a-b). As for PVP, we have known, as surface active agent, it is important to form Se rod. So the usage of it should be controlled at a suitable level to avoid its side effect (Fig. S2e-f).

| Sample   | PVP   | Reaction time | NaOH   | Holding Temperature | Rate of A:B |
|----------|-------|---------------|--------|---------------------|-------------|
| Fig. 1a  | 0.5 g | 24 h          | 0.14 g | 190 °C              | 30:10       |
| Fig. 1b  | 0.5 g | 42 h          | 0.14 g | 190 °C              | 30:10       |
| Fig. 1c  | 0.5 g | 60 h          | 0.14 g | 190 °C              | 30:10       |
| Fig. 1d  | none  | 42 h          | 0.14 g | 190 °C              | 30:10       |
| Fig. S1a | 0.5 g | 42 h          | 0.14 g | 190 °C              | 25:15       |
| Fig. S1c | 0.5 g | 42 h          | 0.14 g | 190 °C              | 35:5        |
| Fig. S2a | 0.5 g | 42 h          | 0.14 g | 170 °C              | 30:10       |
| Fig. S2c | 0.5 g | 42 h          | 0.28 g | 190 °C              | 30:10       |
| Fig. S2e | 1.0g  | 42 h          | 0.14 g | 190 °C              | 30:10       |
| Fig. S2g | 0.5 g | 42 h          | 0.14 g | 190 °C              | 30:10       |

Note: Other conditions are same to preparation of FeSe<sub>2</sub> microtubes in experimental section, except FeSO<sub>4</sub> is used in sample Fig. S2g

**Table S1** The reaction time and dosage of PVP of sample a-d in Fig. 1.

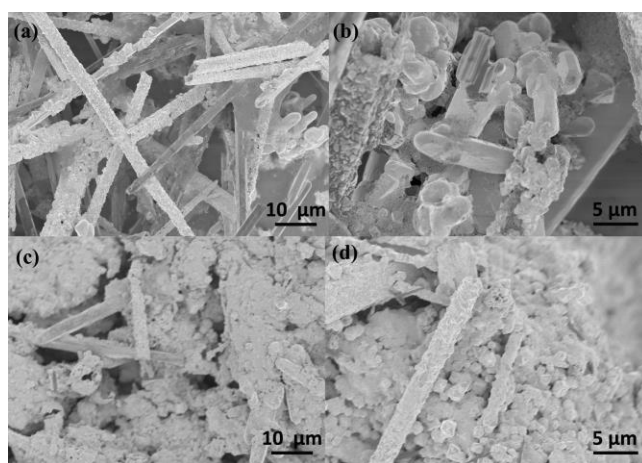

**Fig. S1** SEM images of condition: (a, b) deficient EG and (c, d) too much dosage of EG.

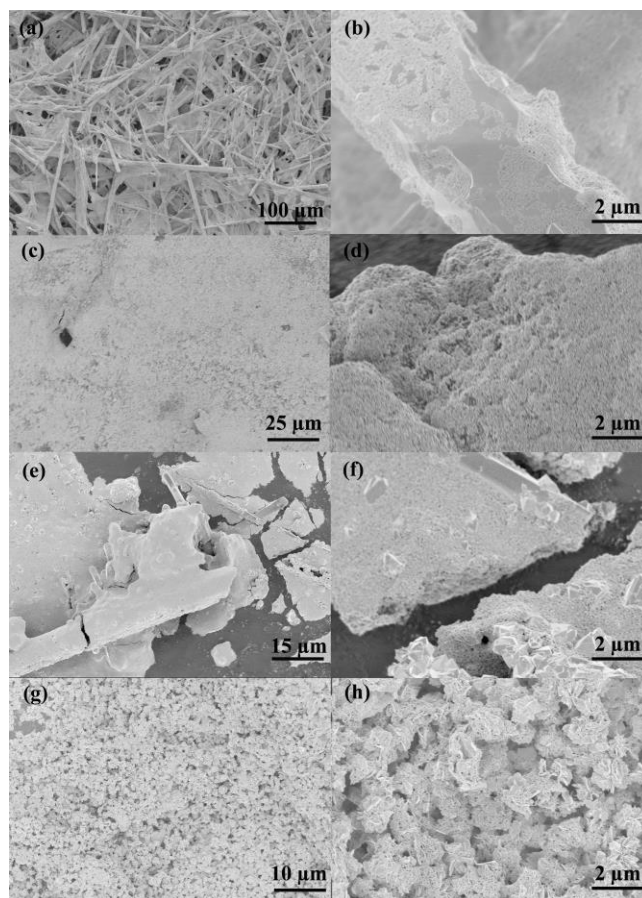

**Fig. S2** SEM images of condition: (a, b) holding temperature 170 °C, (c, d) too much dosage of NaOH, (e, f) superfluous PVP and (g, h) replacement  $\text{Fe}^{3+}$  with  $\text{FeSO}_4$ .

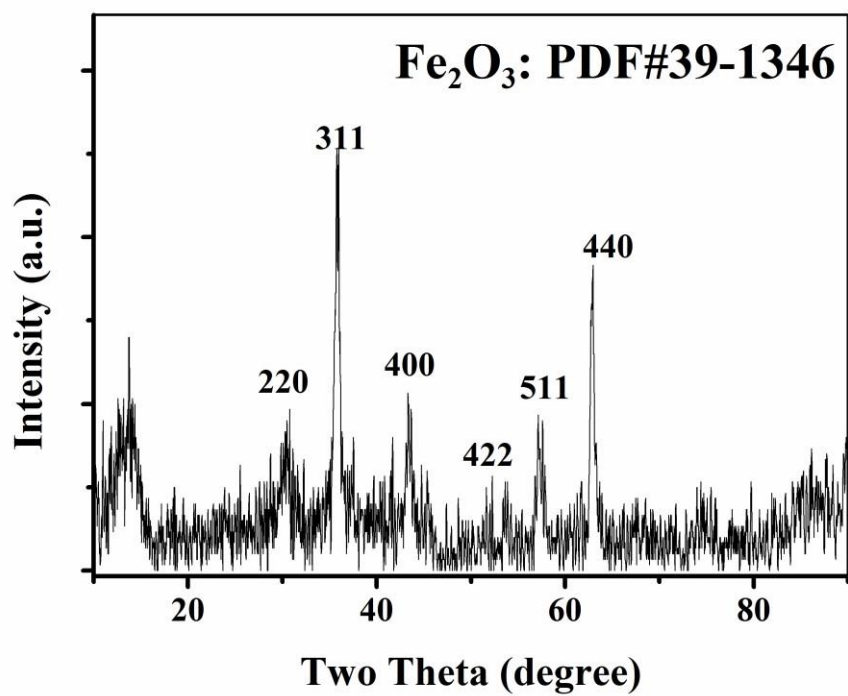

**Fig. S3** XRD pattern of final products in condition: too much dosage of NaOH.
